# Supplementary material
Source: HighWire-hosted journal article supplement (https://bjo.bmj.com/content/103/7/980)
Supplement: inline-supplementary-material-1 [file inline-supplementary-material-1.pdf]

**Supplementary Table.** Definitions of TNM for eyelid carcinoma, *AJCC Cancer Staging Manual*, eighth edition

| Category                                  | Definition                                                                                                                                                 |
|-------------------------------------------|------------------------------------------------------------------------------------------------------------------------------------------------------------|
| <b>Primary tumor (T)</b>                  |                                                                                                                                                            |
| TX                                        | Primary tumor cannot be assessed                                                                                                                           |
| T0                                        | No evidence of primary tumor                                                                                                                               |
| Tis                                       | Carcinoma in situ                                                                                                                                          |
| T1                                        | Tumor $\leq 10$ mm in greatest dimension                                                                                                                   |
| T1a                                       | Tumor does not invade the tarsal plate or eyelid margin                                                                                                    |
| T1b                                       | Tumor invades the tarsal plate or eyelid margin                                                                                                            |
| T1c                                       | Tumor involves full thickness of the eyelid                                                                                                                |
| T2                                        | Tumor $> 10$ mm but $\leq 20$ mm in greatest dimension                                                                                                     |
| T2a                                       | Tumor does not invade the tarsal plate or eyelid margin                                                                                                    |
| T2b                                       | Tumor invades the tarsal plate or eyelid margin                                                                                                            |
| T2c                                       | Tumor involves full thickness of the eyelid                                                                                                                |
| T3                                        | Tumor $> 20$ mm but $\leq 30$ mm in greatest dimension                                                                                                     |
| T3a                                       | Tumor does not invade the tarsal plate or eyelid margin                                                                                                    |
| T3b                                       | Tumor invades the tarsal plate or eyelid margin                                                                                                            |
| T3c                                       | Tumor involves full thickness of the eyelid                                                                                                                |
| T4                                        | Any eyelid tumor that invades adjacent ocular, orbital, or facial structures                                                                               |
| T4a                                       | Tumor invades ocular or intraorbital structures                                                                                                            |
| T4b                                       | Tumor invades (or erodes through) the bony walls of the orbit or extends to the paranasal sinuses or invades the lacrimal sac / nasolacrimal duct or brain |
| <b>Regional lymph nodes (N)</b>           |                                                                                                                                                            |
| NX                                        | Regional lymph nodes cannot be assessed                                                                                                                    |
| N0                                        | No evidence of lymph node involvement                                                                                                                      |
| N1                                        | Metastasis in a single ipsilateral regional lymph node, $\leq 3$ cm in greatest dimension                                                                  |
| N1a                                       | Metastasis in a single ipsilateral regional lymph node based on clinical evaluation or imaging findings                                                    |
| N1b                                       | Metastasis in a single ipsilateral regional lymph node based on lymph node biopsy                                                                          |
| N2                                        | Metastasis in a single ipsilateral regional lymph node, $> 3$ cm in greatest dimension, or in bilateral or contralateral lymph nodes                       |
| N2a                                       | Metastasis documented based on clinical evaluation or imaging findings                                                                                     |
| N2b                                       | Metastasis documented based on microscopic findings on lymph node biopsy                                                                                   |
| <b>Distant metastasis (M)</b>             |                                                                                                                                                            |
| M0                                        | No distant metastasis                                                                                                                                      |
| M1                                        | Distant metastasis                                                                                                                                         |
| AJCC, American Joint Committee on Cancer. |                                                                                                                                                            |
